# Supplementary material for: Genome-Wide Identification and Analysis of MYB Transcription Factors in Pyropia yezoensis
Source: MDPI journal article supplement (doi:10.3390/plants12203613), 2023-10-19
Supplement: s1 [file s1]

Supplementary Table S1. Gene primers designed for qRT-PCR.

| Primers   | Primer sequences (5' to 3') |
|-----------|-----------------------------|
| PyCGS1-F  | CTACGGACACCAAGAAACG         |
| PyCGS1-R  | CTCGGTTGGCTGGGTAA           |
| PyUBC-F   | TCACAACGAGGATTTACCACC       |
| PyUBC-R   | GAGGAGCACCTTGGAACG          |
| PyMYB2-F  | GGCAAGACCCGCAAGAGC          |
| PyMYB2-R  | CGAGATGCCACTCTTGACCC        |
| PyMYB3-F  | GGGACGTGGACGTGTGG           |
| PyMYB3-R  | GAGGGAGGGAGGGCTGA           |
| PyMYB4-F  | CGTCTACCGCCTTCCGTG          |
| PyMYB4-R  | CTGCTGCTCCTGCCTCATC         |
| PyMYB5-F  | GACCTCAAGACCGTTCCCAA        |
| PyMYB5-R  | CTCCGAATACCGCTCCTCAC        |
| PyMYB6-F  | ATTGAGGATGCGTTTTTAGGAGA     |
| PyMYB6-R  | TTGCCGAGTAGAGGGTGAGC        |
| PyMYB7-F  | ACCTACCTCCCCTATGATGACG      |
| PyMYB7-R  | AACAAACTGCTGGTGCTCTGC       |
| PyMYB8-F  | AAGGAGTTTGTGGTCAGCCG        |
| PyMYB8-R  | CCCCGTCAGAATGGAATCG         |
| PyMYB9-F  | ACGGCGCAAGAGAAGGAGT         |
| PyMYB9-R  | GGAAGGACGGTCTGGGAAT         |
| PyMYB12-F | CGAGGAAAGTACACCCTAGCC       |
| PyMYB12-R | CCAGATTAGAGACAGATCCGAAA     |
| PyMYB16-F | ACAGCCAGACATACCAACCCA       |
| PyMYB16-R | CAACCGAGACATCAGCACCA        |
