# Supplementary material for: Genome-Wide Identification and Analysis of MYB Transcription Factors in Pyropia yezoensis
Source: MDPI journal article supplement (doi:10.3390/plants12203613), 2023-10-19
Supplement: s1 [file s1]

Supplementary Table S5. Ka, Ks and Ka/Ks values for duplicated ortholog pairs in *Pyropia yezoensis* and *Pyropia haitanensis*/*Porphyra umbilicalis*.

| No. | Seq 1          | Seq 2             | Ka     | Ks     | Ka/Ks  |
|-----|----------------|-------------------|--------|--------|--------|
| 1.  | <i>PyMYB1</i>  | <i>Ph05488</i>    | 0.1930 | 0.8942 | 0.2158 |
| 2.  | <i>PyMYB2</i>  | <i>Ph05827</i>    | 0.0553 | 0.3528 | 0.1567 |
| 3.  | <i>PyMYB3</i>  | <i>Ph04980</i>    | 0.0780 | 0.4278 | 0.1823 |
| 4.  | <i>PyMYB4</i>  | <i>Ph09887</i>    | 0.1696 | 0.5794 | 0.2927 |
| 5.  | <i>PyMYB5</i>  | <i>Ph02171</i>    | 0.0328 | 0.4024 | 0.0815 |
| 6.  | <i>PyMYB6</i>  | <i>Ph02359</i>    | 0.1479 | 0.5822 | 0.2540 |
| 7.  | <i>PyMYB7</i>  | <i>Ph08492</i>    | 0.2697 | 0.5027 | 0.5365 |
| 8.  | <i>PyMYB8</i>  | <i>Ph06857</i>    | 0.0520 | 0.4748 | 0.1095 |
| 9.  | <i>PyMYB9</i>  | <i>Ph07942</i>    | 0.1887 | 0.7457 | 0.2531 |
| 10. | <i>PyMYB10</i> | <i>Ph07589</i>    | 0.2640 | 0.8541 | 0.3091 |
| 11. | <i>PyMYB12</i> | <i>Ph05957</i>    | 0.5541 | 0.9707 | 0.5708 |
| 12. | <i>PyMYB14</i> | <i>Ph05025</i>    | 0.1970 | 0.5709 | 0.3451 |
| 13. | <i>PyMYB16</i> | <i>Ph09161</i>    | 0.1280 | 0.5195 | 0.2464 |
| 14. | <i>PyMYB2</i>  | <i>PuOSX69724</i> | 0.1411 | 0.7978 | 0.1769 |
| 15. | <i>PyMYB3</i>  | <i>PuOSX72389</i> | 0.0875 | 0.4807 | 0.1820 |
| 16. | <i>PyMYB5</i>  | <i>PuOSX76044</i> | 0.1578 | 1.0509 | 0.1502 |
| 17. | <i>PyMYB6</i>  | <i>PuOSX79855</i> | 0.2451 | 1.3556 | 0.1808 |
| 18. | <i>PyMYB8</i>  | <i>PuOSX75147</i> | 0.1132 | 1.2917 | 0.0876 |
