# Supplementary material for: Genome-Wide Identification and Analysis of MYB Transcription Factors in Pyropia yezoensis
Source: MDPI journal article supplement (doi:10.3390/plants12203613), 2023-10-19
Supplement: s1 [file s1]

Supplementary Table S2.Number of MYB genes in examined species.

| Taxonomic group           | Species name              | MYB genes |      |    |    | Total | Genome size (Mb) | Genome accession in NCBI database |
|---------------------------|---------------------------|-----------|------|----|----|-------|------------------|-----------------------------------|
|                           |                           | 1R        | R2R3 | 3R | 4R |       |                  |                                   |
| Rhodophyta (Red algae)    | Pyropia yezoensis         | 13        | 3    | 0  | 0  | 16    | 107.6            | GCA_009829735.1                   |
|                           | Pyropia haitanensis       | 9         | 4    | 0  | 0  | 13    | 53.3             | GCA_008729055.1                   |
|                           | Porphyra umbilicalis      | 8         | 6    | 0  | 0  | 14    | 87.9             | GCA_002049455.2                   |
|                           | Chondrus crispus          | 15        | 4    | 1  | 1  | 21    | 105.0            | GCF_000350225.1                   |
|                           | Gracilariopsis chorda     | 20        | 6    | 1  | 0  | 27    | 92.2             | GCA_003194525.1                   |
|                           | Porphyridium purpureum    | 32        | 17   | 1  | 0  | 50    | 19.7             | GCA_008690995.1                   |
|                           | Cyanidioschyzon merolae   | 17        | 5    | 0  | 1  | 23    | 16.4             | GCF_000091205.1                   |
|                           | Galdieria sulphuraria     | 16        | 7    | 2  | 0  | 25    | 14.3             | GCF_000341285.1                   |
| Glaucophyta               | Cyanophora paradoxa       | 12        | 3    | 0  | 0  | 15    | 99.9             | GCA_004431415.1                   |
| Chlorophyta (Green algae) | Chlamydomonas reinhardtii | 14        | 10   | 1  | 0  | 25    | 111.1            | GCF_000002595.1_v3.0              |
|                           | Micromonas pusilla        | 19        | 7    | 1  | 0  | 27    | 22.0             | GCF_000151265.2                   |
| Charophyta (Green algae)  | Chara braunii             | 9         | 9    | 2  | 1  | 21    | 1,751.2          | GCA_003427395.1                   |
| Embryophyta               | Arabidopsis thaliana      | 64        | 126  | 5  | 1  | 196   | 115.4            | Ref. (Chen, Yang et al. 2006)     |
